# Supplementary material
Source: PubMed Central journal article supplement (PMC9667384)
Supplement: jop-163-2326-s002.pdf [file jop-163-2326-s002.pdf]

## Supplemental Figure 1

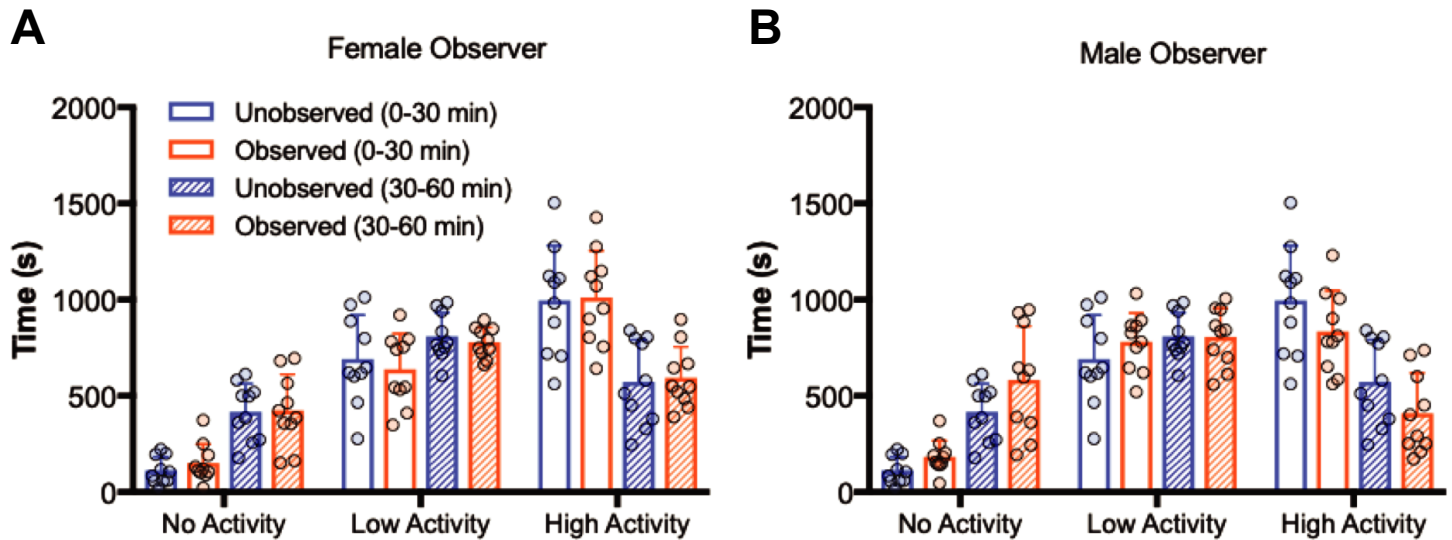

**Supplemental Figure 1.:** Animals were placed in individual enclosed chambers and recorded with a camera for one hour at 30 frames per second. General activity levels were divided into no activity, low activity, and high activity, with the time spend in each quantified. The presence of either a male (**A**) or female (**B**) observer did not impact overall activity of the mice in the enclosure. Data presented as mean  $\pm$  SEM.

## Supplemental Figure 2

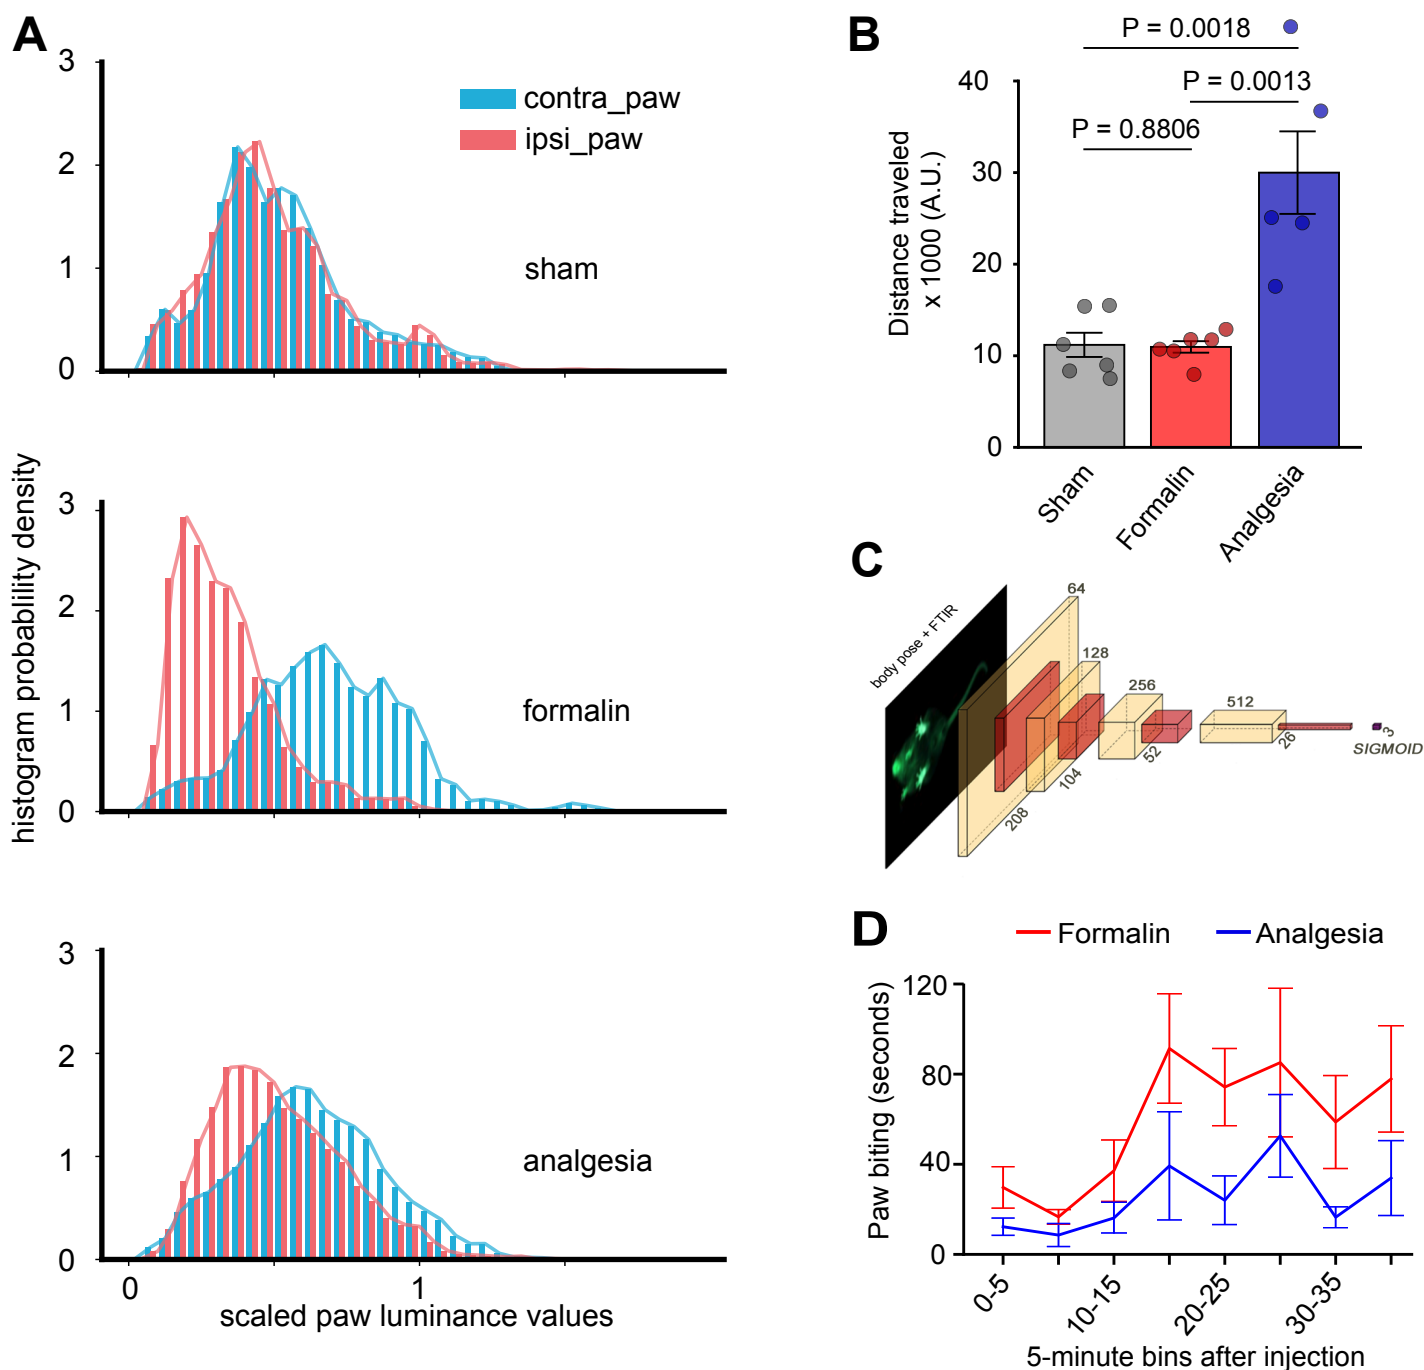

**Supplemental Figure 2.:** **(A)** Density histograms of the scaled paw luminance values from ipsilateral and contralateral hindpaws over 30-minute recording of mice from sham group (top,  $n = 3$ ), formalin group (middle,  $n=3$ ), and analgesia group (bottom,  $n=3$ ). Formalin reduced ipsilateral paw luminance and increased contralateral paw luminance, and this is rescued towards normal levels by morphine. **(B)** The centroid of the mice was tracked using DeepLabCut and used to calculate distance traveled in pixel unit. Mice treated with morphine (3 mg/kg) show hyper-locomotion ( $n=5$ ), compared to sham and formalin groups. **(C)** Schematic diagram of the convolutional neural network for behavior classification with supervised learning. Body frame with superimposed FTIR signal is used as input. Convolutional layers (yellow), max-pooling layers (red), and a sigmoid activation function (purple) are shown with their respective dimensions. **(D)** Automated scoring of paw-biting behavior in mice following intraplantar injection of formalin, with (blue line,  $n=4$ ) and without (red line,  $n=4$ ) concomitant morphine (3 mg/kg) treatment, captures the analgesic effect of morphine as a decrease of paw-biting after formalin injection. Values represent total duration of licking or biting per 5-minute interval. Data presented as mean  $\pm$  SEM. Statistical significance for panel a determined by two-tail unpaired Student's t-test.

### Supplemental Figure 3

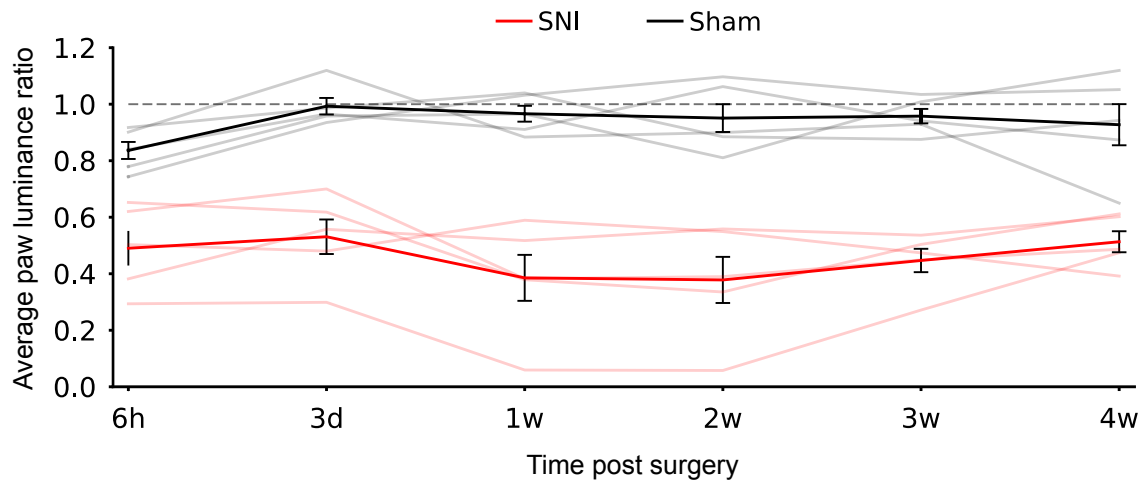

**Supplemental Figure 3.:** Average paw luminance ratio over 20-minute recording captures absence of recovery in 4 weeks in SNI model (red, n=5), compared to the sham group (black, n=5). The readouts of individual mice are shown as shaded lines. Data presented as mean  $\pm$  SEM.

## Supplemental Figure 4

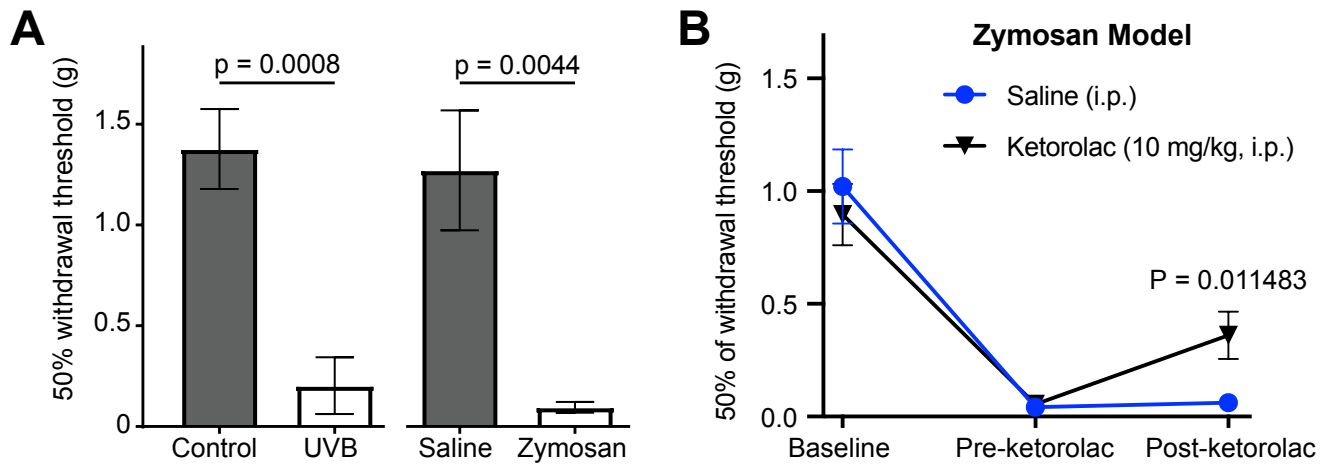

**Supplemental Figure 4.:** **(A)** Mechanical hypersensitivity detected by von Frey withdrawal thresholds of UVB (n=6) or zymosan (n=5) treated mice compared to naïve (n=5) or saline (n=5) treated animals. **(B)** Effect of ketorolac (10 mg/kg and saline control; n=10 for each group) on von Frey mechanical thresholds in the zymosan tonic pain model. Baseline readouts were conducted before zymosan injection, the “pre” readouts were 4 hours after zymosan injection but before ketorolac administration, and the “post” 1 hour after ketorolac administration. Data presented as mean  $\pm$  SEM. Statistical significance determined by two-tail unpaired Student’s t-test. Data presented as mean  $\pm$  SEM. Statistical significance determined by two-tail unpaired Student’s t-test.

## Supplemental Table 1

|                                                                         | von Frey assay                          | The bottom-up imaging technology                    |
|-------------------------------------------------------------------------|-----------------------------------------|-----------------------------------------------------|
| Punctate stimulus                                                       | Yes                                     | No                                                  |
| Evoked response                                                         | Yes                                     | No                                                  |
| Quantitative mechanical threshold measurement                           | Yes                                     | No                                                  |
| Measure mechanical pain in different body locations                     | Yes (e.g., abdomen, hindpaw, cheek pad) | No, restricted to single hindlimb pain              |
| The temporal resolution of the measurement                              | discrete measurement every 30 mins      | Continuous (every 40 ms) over tens of minutes       |
| Number of animals needed for detecting analgesia                        | >8                                      | As small as 5                                       |
| Concurrent detection of hyperlocomotion/sedation                        | No                                      | Yes                                                 |
| In the dark                                                             | No                                      | Yes                                                 |
| Observer-free                                                           | No                                      | Yes                                                 |
| Objective readout                                                       | No                                      | Yes                                                 |
| Automated readout                                                       | No                                      | Yes                                                 |
| Scalability in the application of in vivo analgesic efficacy validation | limited by available human work time    | Parallelizable with sufficient computation resource |

**Supplemental Table 1.:** Differences between the von Frey assay and the bottom-up imaging technology.
